# Supplementary material for: Emissions databases for polycyclic aromatic compounds in the Canadian Athabasca oil sands region – development using current knowledge and evaluation with passive sampling and air dispersion modelling data
Source: Copernicus journal article supplement (doi:10.5194/acp-18-3457-2018), 2018-03-08
Supplement: Supplementary file 1 [file acp-18-3457-2018-supplement.pdf]

Supplement of Atmos. Chem. Phys., 18, 3457–3467, 2018  
<https://doi.org/10.5194/acp-18-3457-2018-supplement>  
© Author(s) 2018. This work is distributed under  
the Creative Commons Attribution 4.0 License.

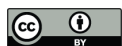

*Supplement of*

**Emissions databases for polycyclic aromatic compounds in the Canadian Athabasca oil sands region – development using current knowledge and evaluation with passive sampling and air dispersion modelling data**

**Xin Qiu et al.**

*Correspondence to:* Xin Qiu ([xinq@novusenv.com](mailto:xinq@novusenv.com)) and Leiming Zhang ([leiming.zhang@canada.ca](mailto:leiming.zhang@canada.ca))

The copyright of individual parts of the supplement might differ from the CC BY 4.0 License.

## **Contents:**

S1. PAC emissions estimation and speciation methodology

S2. CALPUFF model configuration

Table S1. VOC emissions used to calculate PAC emissions

Table S2. Comparisons of model performance between JOSM-derived and CEMA-derived PAH emissions and over local and remote sites.

Tables S3 to S10. PAC emissions estimates and speciation profiles

Tables S11 to S28. Model features, domain and input parameters

Figure S1. Map of tailings pond locations in the CEMA and JOSM emissions databases, oil sands operations, and PAC passive air monitoring locations

Figure S2. Map of the model domain and the study area

Figure S3. Map of unsubstituted PAH emissions in the AOSR

Figure S4: Fire radiative power distribution in the AOSR

Figure S5. Model sensitivity analysis on the impact of point and line (transportation) source emissions (PAHs\_mod) on total PAH concentrations at 17 passive sampling sites (PAHs\_obs)

## **S1 PAC emissions estimation and speciation methodology**

### **S1.1 Tailings ponds**

The PAH emission speciation profiles for oil sands tailings ponds is based on the paper by Galarneau et al. (2014). This study reported 1,069 kg/year emissions from tailings ponds for 13 PAH species during the JOSM field campaign (2011-2013). Based on the relative flux contributions among PAH species in Galarneau's paper, phenanthrene and pyrene dominated tailings pond PAH emissions. In our modelling practice, phenanthrene was given 50% mass fraction weight factor and pyrene was given 30% although they are not explicitly quantified in the paper. The remaining 20% weight factors are evenly distributed among the remaining 11 PAH species. As Galarneau et al. (2014) did not quantify naphthalene, acenaphthylene and acenaphthene, we do not include them in the tailings pond PAH emission. Although acenaphthylene and acenaphthene were excluded in tailings pond emissions, both of them are quantified in other PAH emission sources, such as mine fleet and point sources; therefore, they are included in total PAH emissions. However, in our study, we intentionally excluded naphthalene (NAPH) in our statistical analysis in the main paper due to its higher concentration and uncertainties compared with other PAHs species. This may lead to a bias in the modelling performance of total PAHs. Table S3 summarizes the PAH speciation profiles of tailings pond emissions. The profiles are presented as mass fractions of total PAHs.

In order to develop individual tailings pond PAH emissions for the JOSM-derived emissions database, we propagated the total annual PAH amount to each of the tailings ponds using the area size fraction of each pond and the PAH profiles in Table S3. Table S4 summarizes JOSM tailings pond total PAH emissions and the areas of each tailings pond.

The JOSM database tailings pond polygon areas in Table S4 were estimated from JOSM nonpoint emission source database shapefiles. Based on the coordinates of pond polygons, we calculated the areas of all tailings ponds. Environment and Climate Change Canada's JOSM emissions database files are available online (ECCC, 2016). The CEMA database tailings pond polygon areas in Table S5 were estimated from CEMA nonpoint emission source database files (Vijayaraghavan et al, 2010). We estimated CEMA tailings pond areas using the polygon coordinates supplied in the emissions files. Note that the pond numbers in Table S4 from JOSM are different from those in Table S5 from CEMA. Figure S1 shows the layouts of tailings ponds in the CEMA and JOSM emissions databases.

To maintain consistency in CEMA PAH emissions from tailings ponds, we estimated total tailings PAHs from CEMA by multiplying the JOSM tailings pond PAH total emissions with VOC emission ratios (of emission values from the two inventories), and then applied CEMA pond area size factors for individual ponds, as shown in Table S5.

### **S1.2 Mine face**

There were no measurements of PAHs over oil sands mine face sources available at the time of this study. We made the assumption that PAH species emitted from mine faces should be similar to tailings ponds; thus the speciation profile of tailings pond PAH emissions in Table S3 was used for mine faces. However, PAH emissions intensity was assumed to be less than tailings ponds due to the fact that the total JOSM VOC emissions amount from mine face sources was only approximately 40% of that from tailings ponds (Table S1), although their areas were very close (tailings pond was 182.60 km<sup>2</sup> and mine face was 170.11 km<sup>2</sup>). We also assumed that the PAH emission rates (unit: g/s/m<sup>2</sup>) from mine faces were half of the rates from tailings ponds. In Tables S6 and S7, total PAH emissions from mine face sources were obtained by multiplying the PAH emission rate, the polygon area, and emissions duration (time) for CEMA and JOSM mines, respectively.

CEMA mine face polygon areas in Table S6 were estimated from CEMA nonpoint emissions database files (Vijayaraghavan et al, 2010). We estimated CEMA mine face areas with their polygon coordinates supplied in the emission files. Similarly, the JOSM mine face polygon areas in Table S7 were estimated from JOSM nonpoint emissions database shapefiles. We first estimated the coordinates of mine face polygons and then calculated their areas.

### **S1.3 Mine fleet**

PAH emissions from mine fleet sources were speciated by mass fraction of total VOC emissions from mine fleet. The PAH speciation profiles were based on the CEMA study by Vijayaraghavan et al. (2010). If the total VOC emission rate is known, emissions of individual VOC and PAH compound groups can be calculated using the EPA SPECIATE database (USEPA, 2017). This EPA database provides the mass fraction of various hydrocarbon compounds. Note that the dominant species in mine fleet PAH emissions is naphthalene, which is not quantified in tailings pond emissions. Table S8 summarizes the PAH mass fractions of mine fleet VOCs. Tables S9 and S10 present PAH emissions for CEMA and JOSM mine fleet emissions, respectively. The CEMA mine fleet polygon areas in Table S9 were estimated from CEMA nonpoint emission source database files (Vijayaraghavan et al., 2010). The VOC emissions for mine fleet in the CEMA database were provided as both fleet area polygons and emissions for each of the 11 polygons. In the JOSM database, VOC emissions from mine fleet were provided as a facility total for each of the six facilities. Each facility was assigned one or more mine fleet polygon areas, and then the VOC emissions for each facility was distributed between the mine fleet polygon areas for a given facility. Note that the JOSM mine fleet polygon areas in Table S10 used the same polygon areas as mine face sources. This assumption is based on the fact that all the mine faces are covered by the operating mine fleet vehicles and infrastructure.

### **S1.4 Point sources, transportation, residential and area sources**

In this study, CEMA PAH emissions (Vijayaraghavan et al., 2010) were used for oil sands modeling. Note that the majority of CEMA speciation profiles were based on a series of EIA studies in the oil sands area. Details can be found in the CEMA report (Vijayaraghavan et al.,

2010). For the sources that are not available in CEMA database, PAH species were estimated based on SPECIATE, the EPA's repository of organic and PM speciation profiles of air pollution sources (Simon et al., 2010). The profiles can be used to create speciated emissions inventories for ozone modelling (e.g. NO, NO<sub>2</sub>, and explicit VOC species) and to estimate hazardous and toxic air pollutant emissions from total PM and organic primary emissions. PAH species, such as acenaphthene, acenaphthylene, fluoranthene, etc., are available for the most common emission source types. Note that the SPECIATE database only contains profiles for typical sources operated in the U.S.; thus, speciation profiles may not be available for certain sources operated in northeastern Alberta, such as oil sands facilities. The current version of the SPECIATE database is 4.5.

### **S1.5 Alkylated and DBT emissions**

There is a lack of alkylated PAH and DBT speciation profiles from oil sands studies. U.S. EPA's SPECIATE program does not include oil sands related alkylated PAH species except mobile sources, such as mine fleet. In this study, we included mine fleet emissions profiles and estimated alkylated PAHs from mine fleet and transportation line sources. In addition, we roughly estimated alkylated PAHs and DBTs from tailings ponds indirectly based on the observed PAHs and alkylated PAHs, plus the observed tailings pond PAH emissions from Sect. S1. We made an assumption that the ratio ( $R$ ) between total PAH emissions and total alkylated PAHs or DBTs emissions from tailings ponds is equivalent to the ratio of average PAHs concentration and average alkylated PAHs or DBTs concentration at all 17 passive monitoring sites (Fig. S1b; Schuster et al., 2015). In this sense, the total alkylated PAHs and DBTs emissions from tailings ponds can be calculated from the known PAH emissions from tailings ponds divided by the ratio,  $R$ . Regarding alkylated PAHs and DBTs emissions profiles (i.e., the percentage mass fraction for each of the species), it was assumed to be equivalent to the observed alkylated PAHs and DBTs speciation profiles of the 17 passive monitoring sites.

### **S2 CALPUFF model configuration**

CALPUFF (Scire et al., 2000) is a multi-layer, multi-species, non-steady-state puff dispersion model that can simulate the effects of meteorological conditions, which vary with time and space, on pollutant transport, transformation, and deposition. CALPUFF can use the three-dimensional meteorological fields developed by the CALMET model, or simple, single-station winds in a format consistent with the meteorological files used to drive the ISCST3 steady-state Gaussian model. Details on CALPUFF and model guidance were obtained from AENV (2003), AESRD (2013), CEMA (2011), Lott (1984), Malm (2000), Scire et al. (2000), New Zealand Ministry of the Environment (2004), and USEPA (1995).

The major features and options of the CALPUFF model are summarized in Table S11. Some of the technical algorithms of relevance include:

- Wet and Dry Deposition: Not modelled in this study.

- **Chemical Transformation:** CALPUFF includes options to parameterize chemical transformation effects using the five-species scheme employed in the MESOPUFF II model, a modified six-species scheme adapted from the RIVAD/ARM3 method, or a set of user-specified, diurnally varying transformation rates.
- **Building Downwash:** The Huber-Snyder and Schulman-Scire downwash models are both incorporated into CALPUFF. An option is provided to use either model for all stacks, or make the choice on a stack-by-stack and wind-sector-by-wind-sector basis. Both algorithms have been implemented in such a way as to allow the use of wind-direction specific building dimensions. In addition, there is an option to use PRIME (Plume Rise Model Enhancements) as the method of calculating building downwash. PRIME includes two important features in downwash calculations: (1) enhanced plume dispersion coefficients due to turbulent wake effects, and (2) reduced plume rise due to descending streamlines and increased entrainment in the wake of the building.
- **Dispersion Coefficients:** Several options are provided in CALPUFF for the computation of dispersion coefficients: the use of turbulence measurements ( $\sigma_v$  and  $\sigma_w$ ); the use of similarity theory to estimate  $\sigma_v$  and  $\sigma_w$  from modelled surface heat and momentum fluxes; the use of Pasquill-Gifford (PG) or McElroy-Pooler (MP) dispersion coefficients; or dispersion equations based on the Complex Terrain Dispersion Model (CDTM). Options are provided to apply an averaging-time correction or surface roughness length adjustments to the PG coefficients.

## **Model domain**

The CALPUFF model requires the user to define locations where concentrations are to be calculated. The CALPUFF model domain (Table S12) was selected as 404 km by 580 km area at 4 km grid resolution in order to include a number of sources which might have the potential for impacting the selected Study Area (SA) of Alberta Oil Sands.

## **Meteorology**

CALMET output was used to provide representative wind, temperature and turbulence fields. The three-dimensionally varying fields account for seasonal land-use differences.

## **Model options**

The CALPUFF control file defines the 17 input groups as identified in Table S13. For many of the options, the default values were used in the absence of site/project specific data. Tables S14 to S28 identified the input parameters and the default options. Note that in the tables, values indicated by an asterisk (\*) were allowed to vary spatially across the domain and were obtained from CALMET. A dash (-) indicates that the parameter was not applicable.

**Table S1.** Comparison of VOCs emissions (tonnes yr<sup>-1</sup>) between CEMA and JOSM databases over the model domain. Data from ECCC (2016) and ECCC and AEP (2016).

| Sources                                  | CEMA 2010 | JOSM 2013 |
|------------------------------------------|-----------|-----------|
| Tailings pond                            | 10,458    | 26,783    |
| Mine face                                | 3,655     | 10,053    |
| Mine fleet                               | 2,552     | 2,585     |
| Residential and commercial               | 62        | 62        |
| Non-industry (local traffic and airport) | 26        | 26        |
| Point sources <sup>1</sup>               | 5,092     | 5,092     |
| Line sources                             | 1,313     | 1,313     |

<sup>1</sup> Includes large upstream oil and gas (UOGs) but not small UOGs because most of them are outside the oil sands mining area and there are only a few of them

**Table S2.** Comparisons of model performance between JOSM-derived and CEMA-derived PAH emissions and over local and remote sites.

| Local Sites                             |           |                        |                        |
|-----------------------------------------|-----------|------------------------|------------------------|
| PAHs                                    | Monitored | Modeled-JOSM Emissions | Modeled-CEMA Emissions |
| Mean concentration (ng/m <sup>3</sup> ) | 7.9       | 7.2                    | 6.7                    |
| Percentage Error                        | -         | 17.1%                  | 30.2%                  |
| RMSE (ng/m <sup>3</sup> )               | -         | 1.7                    | 3.4                    |
| Remote Sites                            |           |                        |                        |
| PAHs                                    | Monitored | Modeled-JOSM Emissions | Modeled-CEMA Emissions |
| Mean concentration (ng/m <sup>3</sup> ) | 4.8       | 2.5                    | 1.7                    |
| Percentage Error                        | -         | 65.8%                  | 67.1%                  |
| RMSE (ng/m <sup>3</sup> )               | -         | 3.6                    | 3.5                    |

RMSE: root mean square error

**Table S3. Profile of PAH species in total tailings pond PAHs emissions**

| Species Name           | Percentage of total PAH mass fraction (%) |
|------------------------|-------------------------------------------|
| Acenaphthene           | 0.0                                       |
| Acenaphthylene         | 0.0                                       |
| Anthracene             | 1.82                                      |
| Benz[a]anthracene      | 1.82                                      |
| Benzo[a]pyrene         | 1.82                                      |
| Benzo[b]fluoranthene   | 1.82                                      |
| Benzo[ghi]perylene     | 1.82                                      |
| Benzo[k]fluoranthene   | 1.82                                      |
| Chrysene               | 1.82                                      |
| Dibenz[a,h]anthracene  | 1.82                                      |
| Fluoranthene           | 1.82                                      |
| Fluorene               | 1.82                                      |
| Indeno[1,2,3-cd]pyrene | 1.82                                      |
| Naphthalene            | 0.0                                       |
| Phenanthrene           | 50.0                                      |
| Pyrene                 | 30.0                                      |

**Table S4. PAH emissions of tailings ponds from JOSM-derived emissions database**

| Polygon Name | Area(km <sup>2</sup> ) | PAH(kg/year) |
|--------------|------------------------|--------------|
| Pond JOSM1   | 18.27                  | 106.95       |
| Pond JOSM2   | 1.48                   | 8.65         |
| Pond JOSM3   | 3.25                   | 19.02        |
| Pond JOSM4   | 1.71                   | 9.99         |
| Pond JOSM5   | 0.59                   | 3.48         |
| Pond JOSM6   | 1.46                   | 8.57         |
| Pond JOSM7   | 2.83                   | 16.59        |
| Pond JOSM8   | 6.86                   | 40.16        |
| Pond JOSM9   | 2.98                   | 17.44        |
| Pond JOSM10  | 7.76                   | 45.45        |
| Pond JOSM11  | 12.31                  | 72.09        |
| Pond JOSM12  | 0.43                   | 2.50         |
| Pond JOSM13  | 18.76                  | 109.83       |
| Pond JOSM14  | 28.42                  | 166.40       |
| Pond JOSM15  | 9.82                   | 57.49        |
| Pond JOSM16  | 4.83                   | 28.26        |
| Pond JOSM17  | 3.66                   | 21.41        |
| Pond JOSM18  | 13.22                  | 77.97        |
| Pond JOSM19  | 7.54                   | 44.12        |
| Pond JOSM20  | 1.80                   | 10.54        |
| Pond JOSM21  | 21.64                  | 126.71       |



|             |      |       |
|-------------|------|-------|
| Pond JOSM22 | 8.31 | 48.63 |
| Pond JOSM23 | 3.56 | 20.85 |
| Pond JOSM24 | 1.01 | 5.88  |

**Table S5. PAH emissions of tailings ponds from the CEMA-derived emissions database**

| <b>Polygon Name</b> | <b>Area(km<sup>2</sup>)</b> | <b>PAH(kg/year)</b> |
|---------------------|-----------------------------|---------------------|
| Pond CEMA1          | 7.5                         | 35.68               |
| Pond CEMA2          | 16.9                        | 80.39               |
| Pond CEMA3          | 3.04                        | 14.46               |
| Pond CEMA4          | 0.64                        | 3.04                |
| Pond CEMA5          | 1.6                         | 7.61                |
| Pond CEMA6          | 1.96                        | 9.32                |
| Pond CEMA7          | 3.24                        | 15.41               |
| Pond CEMA8          | 4.41                        | 20.98               |
| Pond CEMA9          | 1.44                        | 6.85                |
| Pond CEMA10         | 13.5                        | 64.22               |
| Pond CEMA11         | 11.5                        | 54.70               |
| Pond CEMA12         | 10.2                        | 48.52               |
| Pond CEMA13         | 6.25                        | 29.73               |
| Pond CEMA14         | 1.96                        | 9.32                |
| Pond CEMA15         | 3.61                        | 17.17               |

**Table S6. PAH emissions from each mine face of the CEMA-derived emissions database**

| <b>Polygon Name</b> | <b>Area(km<sup>2</sup>)</b> | <b>PAH(kg/year)</b> |
|---------------------|-----------------------------|---------------------|
| Mine Face CEMA1     | 1.21                        | 1.66                |
| Mine Face CEMA2     | 4.50                        | 6.19                |
| Mine Face CEMA3     | 11.52                       | 15.9                |
| Mine Face CEMA4     | 6.0                         | 8.26                |
| Mine Face CEMA5     | 8.14                        | 11.2                |
| Mine Face CEMA6     | 3.68                        | 5.06                |

**Table S7. PAH emissions from each mine face of the JOSM-derived emissions database**

| <b>Polygon Name</b> | <b>Area(km<sup>2</sup>)</b> | <b>PAH(kg/year)</b> |
|---------------------|-----------------------------|---------------------|
| Mine Face JOSM1     | 8.68                        | 30.59               |
| Mine Face JOSM2     | 3.53                        | 12.44               |
| Mine Face JOSM3     | 7.32                        | 25.80               |
| Mine Face JOSM4     | 3.24                        | 11.42               |
| Mine Face JOSM5     | 12.14                       | 42.78               |
| Mine Face JOSM6     | 4.97                        | 17.52               |
| Mine Face JOSM7     | 16.03                       | 56.49               |
| Mine Face JOSM8     | 4.31                        | 15.19               |

|                  |       |        |
|------------------|-------|--------|
| Mine Face JOSM9  | 2.65  | 9.34   |
| Mine Face JOSM10 | 8.59  | 30.27  |
| Mine Face JOSM11 | 14.55 | 51.28  |
| Mine Face JOSM12 | 17.46 | 61.53  |
| Mine Face JOSM13 | 2.11  | 7.44   |
| Mine Face JOSM14 | 25.90 | 91.28  |
| Mine Face JOSM15 | 38.65 | 136.21 |

**Table S8. Profile of PAH species as a mass fraction of total mine fleet VOCs**

| Species Name           | Percentage of total VOC mass (%) |
|------------------------|----------------------------------|
| Acenaphthene           | 0.007360883                      |
| Acenaphthylene         | 0.026735644                      |
| Anthracene             | 0.0004767412                     |
| Benz[a]anthracene      | 0.0001136551                     |
| Benzo[a]pyrene         | 0.0                              |
| Benzo[b]fluoranthene   | 0.0                              |
| Benzo[ghi]perylene     | 0.002219707                      |
| Benzo[k]fluoranthene   | 0.0                              |
| Chrysene               | 0.001277666                      |
| Dibenz[a,h]anthracene  | 0.0                              |
| Fluoranthene           | 0.020213825                      |
| Fluorene               | 0.013196195                      |
| Indeno[1,2,3-cd]pyrene | 0.0                              |
| Naphthalene            | 0.235319433                      |
| Phenanthrene           | 0.035507681                      |
| Pyrene                 | 0.027422151                      |

**Table S9. PAH emissions of mine fleet from the CEMA-derived emissions database**

| Polygon Name      | Area(km <sup>2</sup> ) | PAH(kg/year) |
|-------------------|------------------------|--------------|
| Mine Fleet CEMA1  | 4.5                    | 2449.81      |
| Mine Fleet CEMA2  | 0.06                   | 68.47        |
| Mine Fleet CEMA3  | 1.21                   | 501.11       |
| Mine Fleet CEMA4  | 0.06                   | 2.84         |
| Mine Fleet CEMA5  | 0.05                   | 9.49         |
| Mine Fleet CEMA6  | 0.02                   | 27.92        |
| Mine Fleet CEMA7  | 0.08                   | 46.19        |
| Mine Fleet CEMA8  | 11.52                  | 4399.22      |
| Mine Fleet CEMA9  | 6.00                   | 822.32       |
| Mine Fleet CEMA10 | 8.14                   | 1115.34      |
| Mine Fleet CEMA11 | 3.68                   | 130.36       |

**Table S10. PAH emissions of mine fleet from the JOSM-derived emissions database**

| <b>Polygon Name</b> | <b>Area(km<sup>2</sup>)</b> | <b>PAH(kg/year)</b> |
|---------------------|-----------------------------|---------------------|
| Mine Fleet JOSM1    | 8.68                        | 501.45              |
| Mine Fleet JOSM2    | 3.53                        | 279.51              |
| Mine Fleet JOSM3    | 7.32                        | 302.78              |
| Mine Fleet JOSM4    | 3.24                        | 133.88              |
| Mine Fleet JOSM5    | 12.14                       | 501.84              |
| Mine Fleet JOSM6    | 4.97                        | 205.63              |
| Mine Fleet JOSM7    | 16.03                       | 662.78              |
| Mine Fleet JOSM8    | 4.31                        | 178.12              |
| Mine Fleet JOSM9    | 2.65                        | 109.39              |
| Mine Fleet JOSM10   | 8.59                        | 355.39              |
| Mine Fleet JOSM11   | 14.55                       | 882.11              |
| Mine Fleet JOSM12   | 17.46                       | 1058.21             |
| Mine Fleet JOSM13   | 2.11                        | 127.69              |
| Mine Fleet JOSM14   | 25.90                       | 1765.20             |
| Mine Fleet JOSM15   | 38.65                       | 2633.99             |

**Table S11. Major features of the CALPUFF Model**

|                                                                         |                                                                                                                                                                                                                                                                                                                                                                  |
|-------------------------------------------------------------------------|------------------------------------------------------------------------------------------------------------------------------------------------------------------------------------------------------------------------------------------------------------------------------------------------------------------------------------------------------------------|
| <b>Source Types</b>                                                     | Point sources (constant or variable emissions)<br>Line sources (constant or variable emissions)<br>Volume sources (constant or variable emissions)<br>Area sources (constant or variable emissions)                                                                                                                                                              |
| <b>Non-steady-state emissions and meteorological conditions</b>         | Gridded 3-D fields of meteorological variables (winds, temperature)<br>Spatially variable fields of mixing height, friction velocity scale, Monin-Obukhov length, precipitation rate<br>Vertically and horizontally varying turbulence and dispersion rates<br>Time-dependant source and emissions data                                                          |
| <b>Efficient sampling functions</b>                                     | Integrated puff formulation<br>Elongated puff (slug) formulation                                                                                                                                                                                                                                                                                                 |
| <b>Dispersion coefficient (<math>\sigma_y, \sigma_z</math>) options</b> | Direct measurements of $\sigma_v$ and $\sigma_w$<br>Estimated values of $\sigma_v$ and $\sigma_w$ based on similarity theory<br>Pasquill-Gifford (PG) dispersion coefficients (rural areas)<br>McElroy-Pooler (MP) dispersion coefficients (rural areas)<br>CTDM dispersion coefficients (neutral / stable)<br>PDF formulation for the convective boundary layer |
| <b>Vertical wind shear</b>                                              | Puff splitting<br>Differential advection and dispersion                                                                                                                                                                                                                                                                                                          |
| <b>Plume rise</b>                                                       | Partial penetration<br>Buoyant and momentum rise<br>Stack tip effects<br>Vertical wind shear<br>Building downwash effects                                                                                                                                                                                                                                        |
| <b>Building downwash</b>                                                | Huber-Snyder method<br>Schulman-Scire method                                                                                                                                                                                                                                                                                                                     |
| <b>Sub-grid Scale Complex Terrain</b>                                   | CTDM flow module<br>Dividing streamline, Hd<br>- Above Hd puff flows over the hill and experiences altered diffusion rates<br>- Below Hd puff deflects around the hill, splits, and wraps around the hill                                                                                                                                                        |

|                                                          |                                                                                                                                                                                                                                                                                                                                                                                              |
|----------------------------------------------------------|----------------------------------------------------------------------------------------------------------------------------------------------------------------------------------------------------------------------------------------------------------------------------------------------------------------------------------------------------------------------------------------------|
| <b>Interface to the Emissions Production Model (EPM)</b> | Time-varying heat flux and emissions from controlled burns and wildfires                                                                                                                                                                                                                                                                                                                     |
| <b>Dry Deposition</b>                                    | Not modelled in this study                                                                                                                                                                                                                                                                                                                                                                   |
| <b>Over Water and Coastal Interaction Effects</b>        | Over water boundary layer parameters<br>Abrupt change in meteorological conditions, plume dispersion at coastal boundary<br>Plume fumigation<br>Option to introduce sub-grid scale Thermal Internal Boundary Layers (TIBL's) into coastal grid cells                                                                                                                                         |
| <b>Chemical Transformation Options</b>                   | Pseudo-first-order chemical mechanism for SO <sub>2</sub> , NO <sub>x</sub> , HNO <sub>3</sub> , and NO <sub>3</sub> (MESOPUFF II method)<br>Pseudo-first-order chemical mechanism for SO <sub>2</sub> , SO <sub>4</sub> , NO, NO <sub>2</sub> , HNO <sub>3</sub> and NO <sub>3</sub> (RIVAD/ARM3 method)<br>User-specified diurnal cycles of transformation rates<br>No chemical conversion |
| <b>Wet Removal</b>                                       | Not modelled in this study                                                                                                                                                                                                                                                                                                                                                                   |
| <b>Graphical User Interface</b>                          | Point-and-click set-up and data input<br>Enhanced error checking of model inputs<br>On-line Help files                                                                                                                                                                                                                                                                                       |

**Table S12. CALPUFF Model Domain Coordinates (UTM Zone 12; NAD 83) (404 km x 580 km grid)**

| <b>Domain Extent</b> | <b>Easting (km)</b> | <b>Northing (km)</b> |
|----------------------|---------------------|----------------------|
| Southwest            | 306.219             | 6054.418             |
| Northwest            | 306.219             | 6634.418             |
| Southeast            | 710.219             | 6054.418             |
| Northeast            | 710.219             | 6634.418             |

**Table S13. Input Groups in the CALPUFF Control File**

| <b>Input Group</b> | <b>Description</b>                          | <b>Applicable to the Project</b> |
|--------------------|---------------------------------------------|----------------------------------|
| 0                  | Input and output file names                 | Yes                              |
| 1                  | General run control parameters              | Yes                              |
| 2                  | Technical options                           | Yes                              |
| 3                  | Species list                                | Yes                              |
| 4                  | Grid control parameters                     | Yes                              |
| 5                  | Output options                              | Yes                              |
| 6                  | Sub grid scale complex terrain inputs       | No                               |
| 7                  | Dry deposition parameters for gases         | No                               |
| 8                  | Dry deposition parameters for particles     | No                               |
| 9                  | Miscellaneous dry deposition for parameters | No                               |
| 10                 | Wet deposition parameters                   | No                               |
| 11                 | Chemistry parameters                        | Yes                              |
| 12                 | Diffusion and computational parameters      | Yes                              |

|    |                               |     |
|----|-------------------------------|-----|
| 13 | Point source parameters       | Yes |
| 14 | Area source parameters        | Yes |
| 15 | Line source parameters        | No  |
| 16 | Volume source parameters      | No  |
| 17 | Discrete receptor information | Yes |

**Table S14. CALPUFF Model Options Group 1 (Input Group 1: General run control parameters)**

| Parameter                                                        | Default | Project | Comments                                         |
|------------------------------------------------------------------|---------|---------|--------------------------------------------------|
| METRUN                                                           | 0       | 0       | All model periods in met file(s) will be run     |
| IBYR                                                             | -       | 2010    | Starting year                                    |
| IBMO                                                             | -       | 10      | Starting month                                   |
| IBDY                                                             | -       | 1       | Starting day                                     |
| IBHR                                                             | -       | 1       | Starting hour                                    |
| IRLG                                                             | -       | 19752   | Length of run (from Oct 2010 to the end of 2012) |
| XBTZ                                                             | -       | 7       | Base time zone                                   |
| NSPEC                                                            | 5       | 16      | Number of chemical species                       |
| NSE                                                              | 3       | 16      | Number of chemical species to be emitted         |
| ITEST                                                            | 2       | 2       | Program is executed after SETUP phase            |
| <b>Input Group 1: General run control parameters (Continued)</b> |         |         |                                                  |
| Parameter                                                        | Default | Project | Comments                                         |
| MRESTART                                                         | 0       | 0       | Does not read or write a restart file            |
| NRESPD                                                           | 0       | 0       | Restart file written every NRESPD period         |
| METFM                                                            | 1       | 1       | CALMET binary file (CALMET.MET)                  |
| AVET                                                             | 60      | 60      | Averaging time in minutes                        |
| PGTIME                                                           | 60      | 60      | PG Averaging time in minutes                     |

**Table S15. CALPUFF Model Options Group 2 (Input Group 2: Technical Options)**

| Parameter | Default | Project | Comments                                   |
|-----------|---------|---------|--------------------------------------------|
| MGAUSS    | 1       | 1       | Gaussian distribution used in near field   |
| MCTADJ    | 3       | 3       | Partial plume path terrain adjustment      |
| MCTSG     | 0       | 0       | Scale-scale complex terrain not modelled   |
| MSLUG     | 0       | 0       | Near-field puffs not modelled as elongated |
| MTRANS    | 1       | 1       | Transitional plume rise modelled           |
| MTIP      | 1       | 0       | Stack tip downwash used                    |

| Parameter | Default | Project | Comments                                                                                                                     |
|-----------|---------|---------|------------------------------------------------------------------------------------------------------------------------------|
| MBDW      | 1       | 1       | Building downwash simulated using PRIME method                                                                               |
| MSHEAR    | 0       | 1       | Vertical wind shear modelled                                                                                                 |
| MSPLIT    | 0       | 0       | Puffs are not split                                                                                                          |
| MCHEM     | 0       | 0       | Transformation rates computed internally using (RIVID/ARM3) scheme                                                           |
| MAQCHEM   | 0       | 0       | Aqueous phase transformation not modelled                                                                                    |
| MWET      | 1       | 0       | Wet removal not modelled                                                                                                     |
| MDRY      | 1       | 0       | Dry deposition not modelled                                                                                                  |
| MDISP     | 3       | 2       | PG dispersion coefficients from internally calculated sigma v, sigma w using micrometeorological variables (u*, v*, L, etc.) |
| MTURBVW   | 3       | 3       | Use both $\sigma_v$ and $\sigma_w$ from PROFILE.DAT to compute $\sigma_y$ and $\sigma_z$ , (n/a)                             |
| MDISP2    | 3       | 3       | PG dispersion coefficients from internally calculated sigma v, sigma w using micrometeorological variables (u*, v*, L, etc.) |
| MCTURB    | 1       | 1       | Standard CALPUFF subroutines used to compute turbulence $\sigma_v$ and $\sigma_w$                                            |
| MROUGH    | 0       | 0       | PG $\sigma_y$ and $\sigma_z$ adjusted for roughness                                                                          |
| MPARTL    | 1       | 1       | Partial plume penetration of elevated inversion                                                                              |
| MTINV     | 0       | 0       | Strength of temperature inversion computed from default gradients                                                            |
| MPDF      | 0       | 1       | PDF used for dispersion under convective conditions                                                                          |
| MSGTIBL   | 0       | 0       | Sub-grid TIBL module not used for shoreline                                                                                  |
| MBCON     | 0       | 0       | Boundary concentration conditions not modelled                                                                               |
| MFOG      | 0       | 0       | Do not configure for FOG model output                                                                                        |
| MREG      | 1       | 0       | Do not test options specified to see if they conform to regulatory values                                                    |

**Table S16. CALPUFF Model Options Group 3 (Input Group 3: Species list-chemistry options)**

| CSPEC                | Modelled<br>(yes=1,<br>no=0) | Emitted<br>(yes=1, no=0) | Dry (0=none,<br>1=computed-gas,<br>2=computed particle,<br>3=user-specified) | Output group number |
|----------------------|------------------------------|--------------------------|------------------------------------------------------------------------------|---------------------|
| Naphthalene          | 1                            | 1                        | 1                                                                            | 0                   |
| Acenaphthylene       | 1                            | 1                        | 1                                                                            | 0                   |
| Acenaphthene         | 1                            | 1                        | 1                                                                            | 0                   |
| Fluorene             | 1                            | 1                        | 1                                                                            | 0                   |
| Phenanthrene         | 1                            | 1                        | 2                                                                            | 0                   |
| Anthracene           | 1                            | 1                        | 2                                                                            | 0                   |
| Fluoranthene         | 1                            | 1                        | 2                                                                            | 0                   |
| Pyrene               | 1                            | 1                        | 2                                                                            | 0                   |
| Benz(a)anthracene    | 1                            | 1                        | 2                                                                            | 0                   |
| Chrysene             | 1                            | 1                        | 2                                                                            | 0                   |
| Benzo(b)fluoranthene | 1                            | 1                        | 2                                                                            | 0                   |

|                       |   |   |   |   |
|-----------------------|---|---|---|---|
| Benzo(k)fluoranthene  | 1 | 1 | 2 | 0 |
| Benzo(a)pyrene        | 1 | 1 | 2 | 0 |
| Indeno(1,2,3-         | 1 | 1 | 2 | 0 |
| Dibenz(a,h)anthracene | 1 | 1 | 2 | 0 |
| Benzo(g,h,i)perylene  | 1 | 1 | 2 | 0 |

**Table S17. CALPUFF Model Options Group 4 (Input Group 4: Grid control parameter)**

| Parameter | Default | Project                                              | Comments                                                                            |
|-----------|---------|------------------------------------------------------|-------------------------------------------------------------------------------------|
| NX        | -       | 101                                                  | Number of X grid cells in meteorological grid                                       |
| N         |         | 145                                                  | Number of Y grid cells in meteorological grid                                       |
| NZ        | -       | 10                                                   | Number of vertical layers in meteorological grid                                    |
| DGRIDKM   | -       | 4                                                    | Grid spacing (km)                                                                   |
| ZFACE     | -       | 0,20,40,80,160,300<br>600, 1000, 1500,<br>2200, 3000 | Cell face heights in meteorological grid (m)                                        |
| XORIGKM   | -       | 306.219                                              | Reference X coordinate for SW corner of grid cell (1,1) of meteorological grid (km) |
| YORIGKM   | -       | 6054.418                                             | Reference Y coordinate for SW corner of grid cell (1,1) of meteorological grid (km) |
| IUTMZN    | -       | 12                                                   | UTM zone of coordinates                                                             |
| IBCOMP    | -       | 1                                                    | X index of lower left corner of the computational grid                              |
| JBCOMP    | -       | 1                                                    | Y index of lower left corner of the computational grids                             |
| IECOMP    | -       | 101                                                  | X index of the upper right corner of the computational grid                         |
| JECOMP    | -       | 145                                                  | Y index of the upper right corner of the computational grid                         |
| SAMP      | T       | F                                                    | Sampling grid is not used                                                           |
| IBSAMP    | -       | -                                                    | X index of lower left corner of the sampling grid                                   |
| JBSAMP    | -       | -                                                    | Y index of lower left corner of the sampling grid                                   |
| IESAMP    | -       | -                                                    | X index of upper right corner of the sampling grid                                  |
| JESAMP    | -       | -                                                    | Y index of upper right corner of the sampling grid                                  |
| MESHDN    | 1       | 1                                                    | Nesting factor of the sampling grid                                                 |

**Table S18. CALPUFF Model Options Group 5 (Input Group 5: Output Option)**

| Parameter | Default | Project | Comments                                                     |
|-----------|---------|---------|--------------------------------------------------------------|
| ICON      | -       | 1       | Output file CONC.DAT containing concentrations is created    |
| IDRY      | -       | 1       | Output file DFLX.DAT containing dry fluxes is created        |
| IWET      | -       | 1       | Output file WFLX.DAT containing wet fluxes is created        |
| IVIS      | -       | 0       | Output file containing relative humidity data is not created |
| LCOMPRS   | T       | F       | Perform data compression in output file                      |

| Parameter | Default | Project | Comments                                                                                                                             |
|-----------|---------|---------|--------------------------------------------------------------------------------------------------------------------------------------|
| IMFLX     | 0       | 0       | Do not calculate mass fluxes across specific boundaries                                                                              |
| IMBAL     | 0       | 0       | Do not report mass balances                                                                                                          |
| ICPRT     | 0       | 0       | Do not print concentration fields to the output list file                                                                            |
| IDPRT     | 0       | 0       | Do not print dry flux fields to the output list file                                                                                 |
| IWPRT     | 0       | 0       | Do not print wet flux fields to the output list file                                                                                 |
| ICFRQ     | 1       | 1       | Concentration fields are printed to output list file every 1 hour                                                                    |
| IDFRQ     | 1       | 1       | Dry flux fields are printed to output list file every 1 hour                                                                         |
| IWFRQ     | 1       | 1       | Wet flux fields are printed to output list file every 1 hour                                                                         |
| IPRTU     | 1       | 3       | Units for line printer output are in $\mu\text{g}/\text{m}^3$ for concentration and $\mu\text{g}/\text{m}^2/\text{s}$ for deposition |
| IMESG     | 2       | 2       | Messages tracking the progress of run are written on screen                                                                          |
|           |         |         |                                                                                                                                      |
| LDEBUG    | F       | F       | Logical value for debug output                                                                                                       |
| IPFDEB    | 1       | 1       | First puff to track                                                                                                                  |
| NPFDEB    | 1       | 1       | Number of puffs to track                                                                                                             |
| NN1       | 1       | 1       | Meteorological period to start output                                                                                                |
| NN2       | 10      | 10      | Meteorological period to end output                                                                                                  |

**Table S19. CALPUFF Model Options Group 6 (Input Group 6: Sub Grid Scale Complex Terrain Inputs)**

| Parameter | Default | Project | Comments                                                            |
|-----------|---------|---------|---------------------------------------------------------------------|
| NHILL     | 0       | 0       | Number of terrain features                                          |
| NCTREC    | 0       | 0       | Number of special complex terrain receptors                         |
| MHILL     | -       | 2       | Input terrain and receptor data for CTSG hills input in CTDM format |
| XHILL2M   | 1.0     | 1.0     | Conversion factor for changing horizontal dimensions to metres      |
| ZHILL2M   | 1.0     | 1.0     | Conversion factor for changing vertical dimensions to metres        |
| XCTDMKM   | -       | 0       | X origin of CTDM system relative to CALPUFF coordinate system (km)  |
| YCTDMKM   | -       | 0       | Y origin of CTDM system relative to CALPUFF coordinate system (km)  |

**Table S20. CALPUFF Model Option Group 9 (Input Group 9: Miscellaneous Dry Deposition Parameters)**

PAC dry deposition was not modelled in this study. The modelled air concentrations do not account for dry deposition.

**Table S21. CALPUFF Model Option Group 10 (Input Group 10: Wet Deposition Parameters, scavenging coefficients, units:  $\text{s}^{-1}$ )**



PAC wet deposition was not modelled in this study. The modelled air concentrations do not account for wet deposition.

**Table S22. CALPUFF Model Option Group 11 (Input Group 11: Chemistry Parameters)**

| Parameters | Default | Project | Comments                                                                                                     |
|------------|---------|---------|--------------------------------------------------------------------------------------------------------------|
| MOZ        | 1       | 0       | Use monthly ozone values                                                                                     |
| BCKO3      | 80-     | 40      | Monthly background ozone concentration (ppb)                                                                 |
| BCKNH3     | 10      | 10      | Monthly background ammonia concentration (ppb)                                                               |
| RNITE1     | 0.2     | 0.2     | Night time NO <sub>2</sub> loss rate in percent/hour                                                         |
| RNITE2     | 2       | 2       | Night time NO <sub>x</sub> loss rate in percent/hour                                                         |
| RNITE3     | 2       | 2       | Night time HNO <sub>3</sub> loss rate in percent/hour                                                        |
| MH202      | 1       | 1       | Background H <sub>2</sub> O <sub>2</sub> concentrations (Aqueous phase transformations not modelled)         |
| BCKH202    | -       | -1.00   | Background monthly H <sub>2</sub> O <sub>2</sub> concentrations (Aqueous phase transformations not modelled) |

**Table S23. CALPUFF Model Option Group 12 (Input Group 12: Dispersion/Computational Parameters)**

| Parameters | Default | Project | Comments                                                                                                                          |
|------------|---------|---------|-----------------------------------------------------------------------------------------------------------------------------------|
| SYDEP      | 550     | 550     | Horizontal size of a puff in metres beyond which the time dependant dispersion equation of Heffter (1965) is used                 |
| MHFTSZ     | 0       | 0       | Do not use Heffter formulas for sigma z                                                                                           |
| JSUP       | 5       | 5       | Stability class used to determine dispersion rates for puffs above boundary layer                                                 |
| CONK1      | 0.01    | 0.01    | Vertical dispersion constant for stable conditions                                                                                |
| CONK2      | 0.1     | 0.1     | Vertical dispersion constant for neutral/stable conditions                                                                        |
| TBD        | 0.5     | 0.5     | Use ISC transition point for determining the transition point between the Schulman-Scire to Huber-Snyder Building Downwash scheme |
| IURB1      | 10      | 10      | Lower range of land use categories for which urban dispersion is assumed                                                          |
| IURB2      | 19      | 19      | Upper range of land use categories for which urban dispersion is assumed                                                          |
| ILANDUIN   | 20      | 20      | Land use category for modelling domain                                                                                            |
| XLAIIN     | 3.0     | 3.0     | Leaf area index for modelling domain                                                                                              |
| ZOIN       | 0.25    | 0.25    | Roughness length in metres for modelling domain                                                                                   |
| ISIGMAV    | 1       | 1       | Sigma-v is read for lateral turbulence data                                                                                       |
| IMIXCTDM   | 0       | 0       | Predicted mixing heights are used                                                                                                 |
| XMLLEN     | 1.0     | 1.0     | Maximum length of emitted slug in meteorological grid units                                                                       |
| XSAMLEN    | 1.0     | 10.0    | Maximum travel distance of slug or puff in meteorological grid units during one sampling unit                                     |
| MXNEW      | 99      | 60      | Maximum number of puffs or slugs released from one source during one time step                                                    |
| MXSAM      | 99      | 60      | Maximum number of sampling steps during one time step for a puff or slug                                                          |
| NCOUNT     | 2       | 2       | Number of iterations used when computing the transport wind for a                                                                 |

| Parameters                                                                                                                                                                                                                                                                                                                                                                                                                                                                                                                                                                                                                 | Default                                                | Project                                                | Comments                                                                                                                  |                 |           |  |       |       |                                         |                                         |   |      |     |   |      |      |   |     |      |   |      |      |   |      |      |   |      |       |
|----------------------------------------------------------------------------------------------------------------------------------------------------------------------------------------------------------------------------------------------------------------------------------------------------------------------------------------------------------------------------------------------------------------------------------------------------------------------------------------------------------------------------------------------------------------------------------------------------------------------------|--------------------------------------------------------|--------------------------------------------------------|---------------------------------------------------------------------------------------------------------------------------|-----------------|-----------|--|-------|-------|-----------------------------------------|-----------------------------------------|---|------|-----|---|------|------|---|-----|------|---|------|------|---|------|------|---|------|-------|
|                                                                                                                                                                                                                                                                                                                                                                                                                                                                                                                                                                                                                            |                                                        |                                                        | sampling step that includes transitional plume rise                                                                       |                 |           |  |       |       |                                         |                                         |   |      |     |   |      |      |   |     |      |   |      |      |   |      |      |   |      |       |
| SYMIN                                                                                                                                                                                                                                                                                                                                                                                                                                                                                                                                                                                                                      | 1.0                                                    | 1.0                                                    | Minimum sigma y in metres for a new puff or slug                                                                          |                 |           |  |       |       |                                         |                                         |   |      |     |   |      |      |   |     |      |   |      |      |   |      |      |   |      |       |
| SZMIN                                                                                                                                                                                                                                                                                                                                                                                                                                                                                                                                                                                                                      | 1                                                      | 1                                                      | Minimum sigma z in metres for a new puff or slug                                                                          |                 |           |  |       |       |                                         |                                         |   |      |     |   |      |      |   |     |      |   |      |      |   |      |      |   |      |       |
| <table border="1"> <thead> <tr> <th rowspan="3">Stability Class</th> <th colspan="2">Parameter</th> </tr> <tr> <th>SVMIN</th> <th>SWMIN</th> </tr> <tr> <th>Minimum turbulence (<math>\sigma_v</math>) (m/s)</th> <th>Minimum turbulence (<math>\sigma_w</math>) (m/s)</th> </tr> </thead> <tbody> <tr> <td>A</td> <td>0.5</td> <td>0.2</td> </tr> <tr> <td>B</td> <td>0.5</td> <td>0.12</td> </tr> <tr> <td>C</td> <td>0.5</td> <td>0.08</td> </tr> <tr> <td>D</td> <td>0.5</td> <td>0.06</td> </tr> <tr> <td>E</td> <td>0.5</td> <td>0.03</td> </tr> <tr> <td>F</td> <td>0.5</td> <td>0.016</td> </tr> </tbody> </table> |                                                        |                                                        |                                                                                                                           | Stability Class | Parameter |  | SVMIN | SWMIN | Minimum turbulence ( $\sigma_v$ ) (m/s) | Minimum turbulence ( $\sigma_w$ ) (m/s) | A | 0.5  | 0.2 | B | 0.5  | 0.12 | C | 0.5 | 0.08 | D | 0.5  | 0.06 | E | 0.5  | 0.03 | F | 0.5  | 0.016 |
| Stability Class                                                                                                                                                                                                                                                                                                                                                                                                                                                                                                                                                                                                            | Parameter                                              |                                                        |                                                                                                                           |                 |           |  |       |       |                                         |                                         |   |      |     |   |      |      |   |     |      |   |      |      |   |      |      |   |      |       |
|                                                                                                                                                                                                                                                                                                                                                                                                                                                                                                                                                                                                                            | SVMIN                                                  | SWMIN                                                  |                                                                                                                           |                 |           |  |       |       |                                         |                                         |   |      |     |   |      |      |   |     |      |   |      |      |   |      |      |   |      |       |
|                                                                                                                                                                                                                                                                                                                                                                                                                                                                                                                                                                                                                            | Minimum turbulence ( $\sigma_v$ ) (m/s)                | Minimum turbulence ( $\sigma_w$ ) (m/s)                |                                                                                                                           |                 |           |  |       |       |                                         |                                         |   |      |     |   |      |      |   |     |      |   |      |      |   |      |      |   |      |       |
| A                                                                                                                                                                                                                                                                                                                                                                                                                                                                                                                                                                                                                          | 0.5                                                    | 0.2                                                    |                                                                                                                           |                 |           |  |       |       |                                         |                                         |   |      |     |   |      |      |   |     |      |   |      |      |   |      |      |   |      |       |
| B                                                                                                                                                                                                                                                                                                                                                                                                                                                                                                                                                                                                                          | 0.5                                                    | 0.12                                                   |                                                                                                                           |                 |           |  |       |       |                                         |                                         |   |      |     |   |      |      |   |     |      |   |      |      |   |      |      |   |      |       |
| C                                                                                                                                                                                                                                                                                                                                                                                                                                                                                                                                                                                                                          | 0.5                                                    | 0.08                                                   |                                                                                                                           |                 |           |  |       |       |                                         |                                         |   |      |     |   |      |      |   |     |      |   |      |      |   |      |      |   |      |       |
| D                                                                                                                                                                                                                                                                                                                                                                                                                                                                                                                                                                                                                          | 0.5                                                    | 0.06                                                   |                                                                                                                           |                 |           |  |       |       |                                         |                                         |   |      |     |   |      |      |   |     |      |   |      |      |   |      |      |   |      |       |
| E                                                                                                                                                                                                                                                                                                                                                                                                                                                                                                                                                                                                                          | 0.5                                                    | 0.03                                                   |                                                                                                                           |                 |           |  |       |       |                                         |                                         |   |      |     |   |      |      |   |     |      |   |      |      |   |      |      |   |      |       |
| F                                                                                                                                                                                                                                                                                                                                                                                                                                                                                                                                                                                                                          | 0.5                                                    | 0.016                                                  |                                                                                                                           |                 |           |  |       |       |                                         |                                         |   |      |     |   |      |      |   |     |      |   |      |      |   |      |      |   |      |       |
| CDIV                                                                                                                                                                                                                                                                                                                                                                                                                                                                                                                                                                                                                       | 0.0, 0.0                                               | 0.0, 0.0                                               | Divergence criteria for dw/dz in met cells                                                                                |                 |           |  |       |       |                                         |                                         |   |      |     |   |      |      |   |     |      |   |      |      |   |      |      |   |      |       |
| WSCALM                                                                                                                                                                                                                                                                                                                                                                                                                                                                                                                                                                                                                     | 0.5                                                    | 0.5                                                    | Minimum wind speed allowed for non-calm conditions (m/s)                                                                  |                 |           |  |       |       |                                         |                                         |   |      |     |   |      |      |   |     |      |   |      |      |   |      |      |   |      |       |
| XMAXZI                                                                                                                                                                                                                                                                                                                                                                                                                                                                                                                                                                                                                     | 3000                                                   | 3000                                                   | Maximum mixing height in metres                                                                                           |                 |           |  |       |       |                                         |                                         |   |      |     |   |      |      |   |     |      |   |      |      |   |      |      |   |      |       |
| XMINZI                                                                                                                                                                                                                                                                                                                                                                                                                                                                                                                                                                                                                     | 50                                                     | 50                                                     | Minimum mixing height in metres                                                                                           |                 |           |  |       |       |                                         |                                         |   |      |     |   |      |      |   |     |      |   |      |      |   |      |      |   |      |       |
| WSCAT                                                                                                                                                                                                                                                                                                                                                                                                                                                                                                                                                                                                                      |                                                        | 1.54                                                   | wind speed category 1 [m/s]                                                                                               |                 |           |  |       |       |                                         |                                         |   |      |     |   |      |      |   |     |      |   |      |      |   |      |      |   |      |       |
|                                                                                                                                                                                                                                                                                                                                                                                                                                                                                                                                                                                                                            |                                                        | 3.09                                                   | wind speed category 2 [m/s]                                                                                               |                 |           |  |       |       |                                         |                                         |   |      |     |   |      |      |   |     |      |   |      |      |   |      |      |   |      |       |
|                                                                                                                                                                                                                                                                                                                                                                                                                                                                                                                                                                                                                            |                                                        | 5.14                                                   | wind speed category 3 [m/s]                                                                                               |                 |           |  |       |       |                                         |                                         |   |      |     |   |      |      |   |     |      |   |      |      |   |      |      |   |      |       |
|                                                                                                                                                                                                                                                                                                                                                                                                                                                                                                                                                                                                                            |                                                        | 8.23                                                   | wind speed category 4 [m/s]                                                                                               |                 |           |  |       |       |                                         |                                         |   |      |     |   |      |      |   |     |      |   |      |      |   |      |      |   |      |       |
|                                                                                                                                                                                                                                                                                                                                                                                                                                                                                                                                                                                                                            |                                                        | 10.8                                                   | wind speed category 5 [m/s]                                                                                               |                 |           |  |       |       |                                         |                                         |   |      |     |   |      |      |   |     |      |   |      |      |   |      |      |   |      |       |
| SL2PF                                                                                                                                                                                                                                                                                                                                                                                                                                                                                                                                                                                                                      | 10                                                     | 10                                                     | Slug-to-puff transition criterion factor equal to sigma y/length of slug                                                  |                 |           |  |       |       |                                         |                                         |   |      |     |   |      |      |   |     |      |   |      |      |   |      |      |   |      |       |
| <b>Input Group 12: Dispersion/Computational Parameters (Continued)</b>                                                                                                                                                                                                                                                                                                                                                                                                                                                                                                                                                     |                                                        |                                                        |                                                                                                                           |                 |           |  |       |       |                                         |                                         |   |      |     |   |      |      |   |     |      |   |      |      |   |      |      |   |      |       |
| Parameters                                                                                                                                                                                                                                                                                                                                                                                                                                                                                                                                                                                                                 | Default                                                | Project                                                | Comments                                                                                                                  |                 |           |  |       |       |                                         |                                         |   |      |     |   |      |      |   |     |      |   |      |      |   |      |      |   |      |       |
| PTG0                                                                                                                                                                                                                                                                                                                                                                                                                                                                                                                                                                                                                       | 0.02                                                   | 0.02                                                   | potential temperature gradient for E stability [K/m]                                                                      |                 |           |  |       |       |                                         |                                         |   |      |     |   |      |      |   |     |      |   |      |      |   |      |      |   |      |       |
|                                                                                                                                                                                                                                                                                                                                                                                                                                                                                                                                                                                                                            | 0.035                                                  | 0.035                                                  | potential temperature gradient for F stability [K/m]                                                                      |                 |           |  |       |       |                                         |                                         |   |      |     |   |      |      |   |     |      |   |      |      |   |      |      |   |      |       |
| NSPLIT                                                                                                                                                                                                                                                                                                                                                                                                                                                                                                                                                                                                                     | 3                                                      | 3                                                      | Number of puffs that result every time a puff is split                                                                    |                 |           |  |       |       |                                         |                                         |   |      |     |   |      |      |   |     |      |   |      |      |   |      |      |   |      |       |
| IRESPLIT                                                                                                                                                                                                                                                                                                                                                                                                                                                                                                                                                                                                                   | 0,0,0,0,00,0,0,<br>0,0,0,0,0,0,0,0,<br>0,1,0,0,0,0,0,0 | 0,0,0,0,00,0,0,0,0,<br>0,0,0,0,0,0,0,1,0,0<br>,0,0,0,0 | Time(s) of day when split puffs are eligible to be split once again                                                       |                 |           |  |       |       |                                         |                                         |   |      |     |   |      |      |   |     |      |   |      |      |   |      |      |   |      |       |
| <table border="1"> <thead> <tr> <th rowspan="3">Stability Class</th> <th colspan="2">Parameter</th> </tr> <tr> <th>PLX0</th> <th>PPC</th> </tr> <tr> <th>Wind speed profile exponent</th> <th>Plume path coefficient</th> </tr> </thead> <tbody> <tr> <td>A</td> <td>0.07</td> <td>0.8</td> </tr> <tr> <td>B</td> <td>0.07</td> <td>0.7</td> </tr> <tr> <td>C</td> <td>0.1</td> <td>0.6</td> </tr> <tr> <td>D</td> <td>0.15</td> <td>0.5</td> </tr> <tr> <td>E</td> <td>0.35</td> <td>0.4</td> </tr> <tr> <td>F</td> <td>0.55</td> <td>0.35</td> </tr> </tbody> </table>                                                   |                                                        |                                                        |                                                                                                                           | Stability Class | Parameter |  | PLX0  | PPC   | Wind speed profile exponent             | Plume path coefficient                  | A | 0.07 | 0.8 | B | 0.07 | 0.7  | C | 0.1 | 0.6  | D | 0.15 | 0.5  | E | 0.35 | 0.4  | F | 0.55 | 0.35  |
| Stability Class                                                                                                                                                                                                                                                                                                                                                                                                                                                                                                                                                                                                            | Parameter                                              |                                                        |                                                                                                                           |                 |           |  |       |       |                                         |                                         |   |      |     |   |      |      |   |     |      |   |      |      |   |      |      |   |      |       |
|                                                                                                                                                                                                                                                                                                                                                                                                                                                                                                                                                                                                                            | PLX0                                                   | PPC                                                    |                                                                                                                           |                 |           |  |       |       |                                         |                                         |   |      |     |   |      |      |   |     |      |   |      |      |   |      |      |   |      |       |
|                                                                                                                                                                                                                                                                                                                                                                                                                                                                                                                                                                                                                            | Wind speed profile exponent                            | Plume path coefficient                                 |                                                                                                                           |                 |           |  |       |       |                                         |                                         |   |      |     |   |      |      |   |     |      |   |      |      |   |      |      |   |      |       |
| A                                                                                                                                                                                                                                                                                                                                                                                                                                                                                                                                                                                                                          | 0.07                                                   | 0.8                                                    |                                                                                                                           |                 |           |  |       |       |                                         |                                         |   |      |     |   |      |      |   |     |      |   |      |      |   |      |      |   |      |       |
| B                                                                                                                                                                                                                                                                                                                                                                                                                                                                                                                                                                                                                          | 0.07                                                   | 0.7                                                    |                                                                                                                           |                 |           |  |       |       |                                         |                                         |   |      |     |   |      |      |   |     |      |   |      |      |   |      |      |   |      |       |
| C                                                                                                                                                                                                                                                                                                                                                                                                                                                                                                                                                                                                                          | 0.1                                                    | 0.6                                                    |                                                                                                                           |                 |           |  |       |       |                                         |                                         |   |      |     |   |      |      |   |     |      |   |      |      |   |      |      |   |      |       |
| D                                                                                                                                                                                                                                                                                                                                                                                                                                                                                                                                                                                                                          | 0.15                                                   | 0.5                                                    |                                                                                                                           |                 |           |  |       |       |                                         |                                         |   |      |     |   |      |      |   |     |      |   |      |      |   |      |      |   |      |       |
| E                                                                                                                                                                                                                                                                                                                                                                                                                                                                                                                                                                                                                          | 0.35                                                   | 0.4                                                    |                                                                                                                           |                 |           |  |       |       |                                         |                                         |   |      |     |   |      |      |   |     |      |   |      |      |   |      |      |   |      |       |
| F                                                                                                                                                                                                                                                                                                                                                                                                                                                                                                                                                                                                                          | 0.55                                                   | 0.35                                                   |                                                                                                                           |                 |           |  |       |       |                                         |                                         |   |      |     |   |      |      |   |     |      |   |      |      |   |      |      |   |      |       |
| ZISPLIT                                                                                                                                                                                                                                                                                                                                                                                                                                                                                                                                                                                                                    | 100                                                    | 100                                                    | Minimum allowable last hour's mixing height for puff splitting                                                            |                 |           |  |       |       |                                         |                                         |   |      |     |   |      |      |   |     |      |   |      |      |   |      |      |   |      |       |
| ROLDMAX                                                                                                                                                                                                                                                                                                                                                                                                                                                                                                                                                                                                                    | 0.25                                                   | 0.25                                                   | Maximum allowable ratio of last hour's mixing height and maximum mixing height experienced by the puff for puff splitting |                 |           |  |       |       |                                         |                                         |   |      |     |   |      |      |   |     |      |   |      |      |   |      |      |   |      |       |
| NSPLITH                                                                                                                                                                                                                                                                                                                                                                                                                                                                                                                                                                                                                    | 5                                                      | 5                                                      | Number of puffs that result every time a puff is horizontally split                                                       |                 |           |  |       |       |                                         |                                         |   |      |     |   |      |      |   |     |      |   |      |      |   |      |      |   |      |       |
| SYSPLITH                                                                                                                                                                                                                                                                                                                                                                                                                                                                                                                                                                                                                   | 1                                                      | 1                                                      | Minimum sigma-y of puff before it may be horizontally split                                                               |                 |           |  |       |       |                                         |                                         |   |      |     |   |      |      |   |     |      |   |      |      |   |      |      |   |      |       |
| SHSPLITH                                                                                                                                                                                                                                                                                                                                                                                                                                                                                                                                                                                                                   | 2                                                      | 2                                                      | Minimum puff elongation rate due to wind shear before it may be horizontally split                                        |                 |           |  |       |       |                                         |                                         |   |      |     |   |      |      |   |     |      |   |      |      |   |      |      |   |      |       |

| Parameters | Default  | Project | Comments                                                                          |
|------------|----------|---------|-----------------------------------------------------------------------------------|
| CNSPLITH   | 1.00E-07 | 0       | Minimum concentration of each species in puff before it may be horizontally split |
| EPSSLUG    | 1.00E-04 | 0       | Fractional convergence criterion for numerical SLUG sampling iteration            |
| EPSAREA    | 1.00E-06 | 0       | Fractional convergence criterion for numerical AREA sampling iteration            |
| DRISE      | 1        | 1       | Trajectory step length for numerical rise                                         |

**Table S24. CALPUFF Model Option Group 13 (Input Group 13: Point Source Parameters)**

| Parameters | Default | Project | Comments                                                                                       |
|------------|---------|---------|------------------------------------------------------------------------------------------------|
| NPT1       | -       | 689     | Number of point sources with constant stack parameters or variable emission rate scale factors |
| IPTU       | 1       | 1       | Units for point source emission rates are g/s                                                  |
| NSPT1      | 0       | 0       | Number of source-species combinations with variable emissions scaling factors                  |
| NPT2       | -       | 0       | Number of point sources with variable emission parameters provided in external file            |

**Table S25. CALPUFF Model Option Group 14 (Input Group 14: Area Source Parameters)**

| Parameters | Default | Project | Comments                                                                              |
|------------|---------|---------|---------------------------------------------------------------------------------------|
| NAR1       | -       | 87      | Number of polygon area sources                                                        |
| IARU       | 1       | 1       | Units for point source emission rates are g/ m <sup>2</sup> /s                        |
| NSAR1      | 0       | 880     | Number of source-species combinations with variable emissions scaling factors         |
| NAR2       | -       | 0       | Number of buoyant polygon area sources with variable location and emission parameters |

**Table S26. CALPUFF Model Option Group 15 (Input Group 15: Line Source Parameters)**

| Parameters | Default | Project | Comments                                                                       |
|------------|---------|---------|--------------------------------------------------------------------------------|
| NLN2       | -       | -       | Number of buoyant line sources with variable location and emission parameters  |
| NLINES     | -       | 29      | Number of buoyant line sources                                                 |
| ILNU       | 1       | 1       | Units for line source emission rates is g/s                                    |
| NSLN1      | 0       | 0       | Number of source-species combinations with variable emissions scaling factors. |
| MXNSEG     | 7       | 7       | Maximum number of segments used to model each line                             |
| NLRISE     | 6       | 6       | Number of distance at which transitional rise is computed                      |
| XL         | -       | 22.81   | Average line source length (m)                                                 |
| HBL        | -       | 2.0     | Average height of line source height (m)                                       |
| WBL        | -       | 10.0    | Average building width (m)                                                     |
| WML        | -       | 0.5     | Average line source width (m)                                                  |

|         |   |      |                                          |
|---------|---|------|------------------------------------------|
| DXL     | - | 2.0  | Average separation between buildings (m) |
| FPRIMEL | - | 50.0 | Average buoyancy parameter (m4/s3)       |

**Table S27. CALPUFF Model Option Group 16 (Input Group 16: Volume Source Parameters)**

| Parameters | Default | Project | Comments                                                                      |
|------------|---------|---------|-------------------------------------------------------------------------------|
| NVL1       | -       | 0       | Number of volume sources                                                      |
| IVLU       | 1       | 1       | Units for volume source emission rates is grams per second                    |
| NSVL1      | 0       | 0       | Number of source-species combinations with variable emissions scaling factors |
| IGRDVL     | -       | -       | Gridded volume source data is not used                                        |
| VEFFHT     | -       | -       | Effective height of emissions (m)                                             |
| VSIGYI     | -       | -       | Initial sigma y value (m)                                                     |
| VSIGZI     | -       | -       | Initial sigma z value (m)                                                     |

**Table S28. CALPUFF Model Option Group 17 (Input Group 17: Discrete Receptor Information)**

| Parameters | Default | Project | Comments                        |
|------------|---------|---------|---------------------------------|
| NREC       | -       | 9300    | Number of non-gridded receptors |

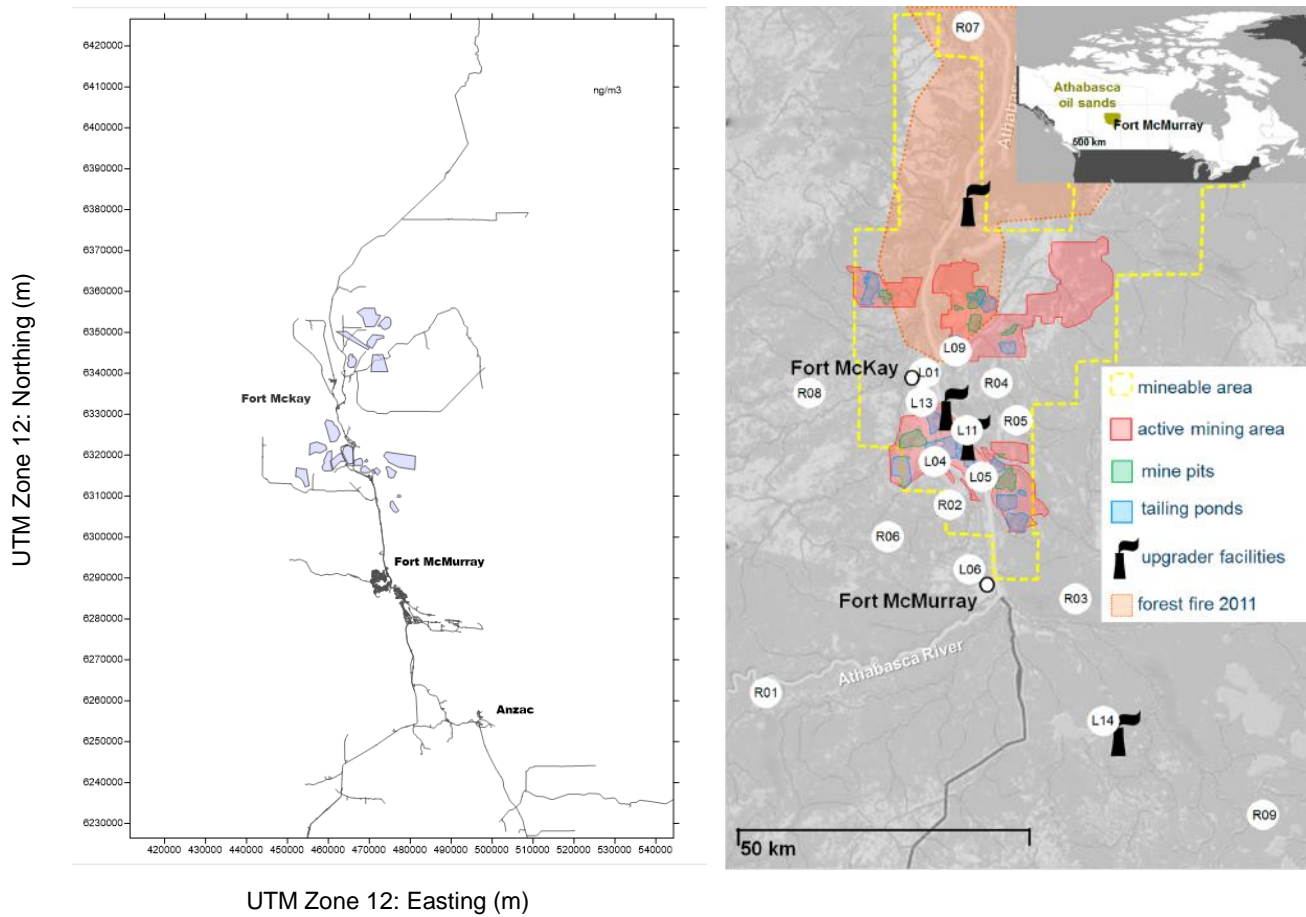

**Figure S1.** Map of tailings pond locations (shown in blue) in the CEMA emissions database (a) and PAC passive air monitoring locations from JOSM activities and oil sands operations obtained from Schuster et al. (2015) (b).

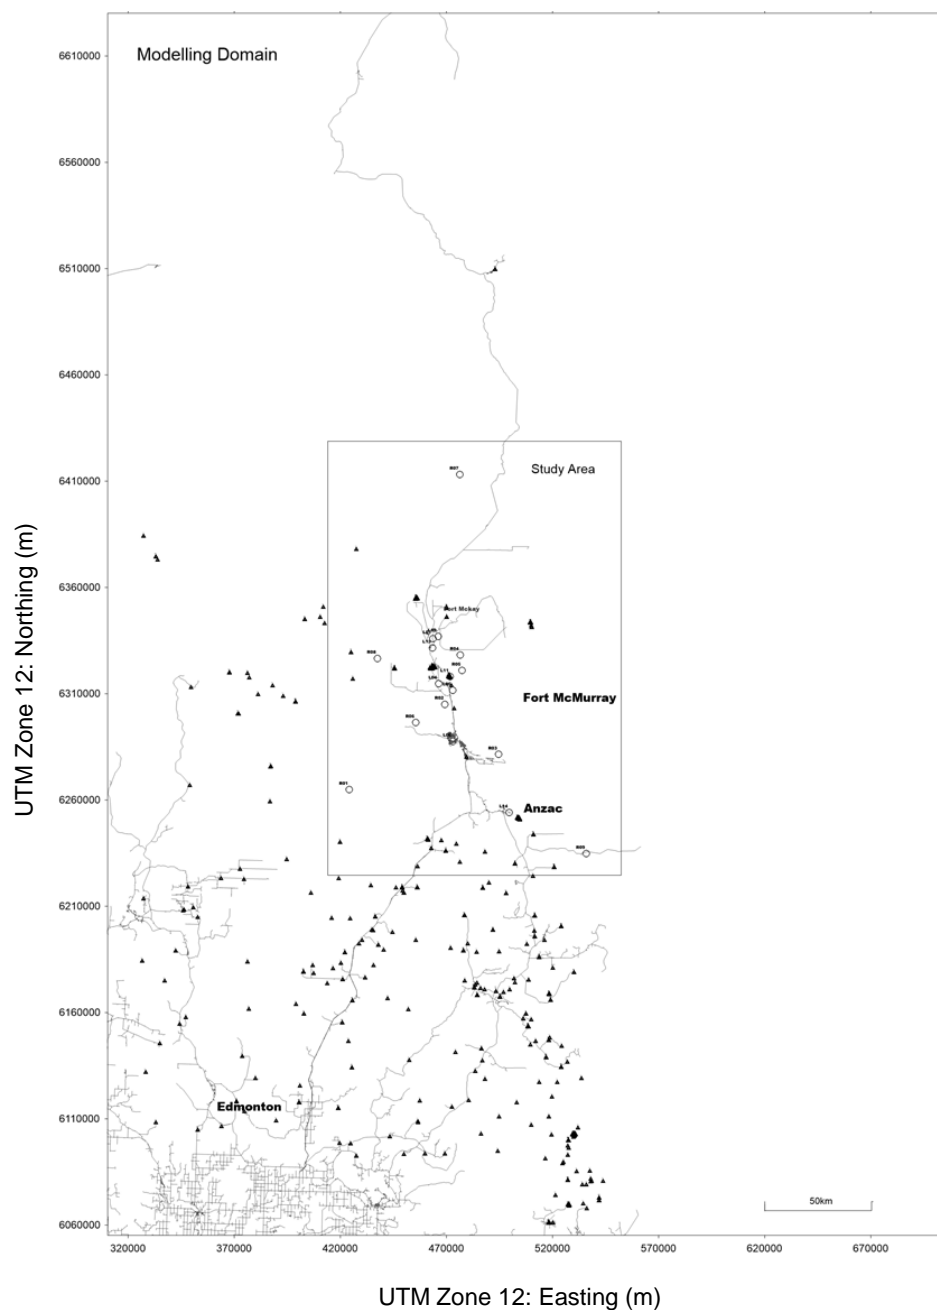

**Figure S2.** Map showing the point sources accounted for in the model domain and the study area where modelled concentrations are compared with measured air concentrations (Fig. S1). Black triangles indicate VOC point source locations are from the CEMA emissions database (Vijayarahavan et al., 2010) and the Capital Region Particulate Matter Air Modelling Assessment (Nopmongcol et al., 2014), which are converted to PAH emissions.

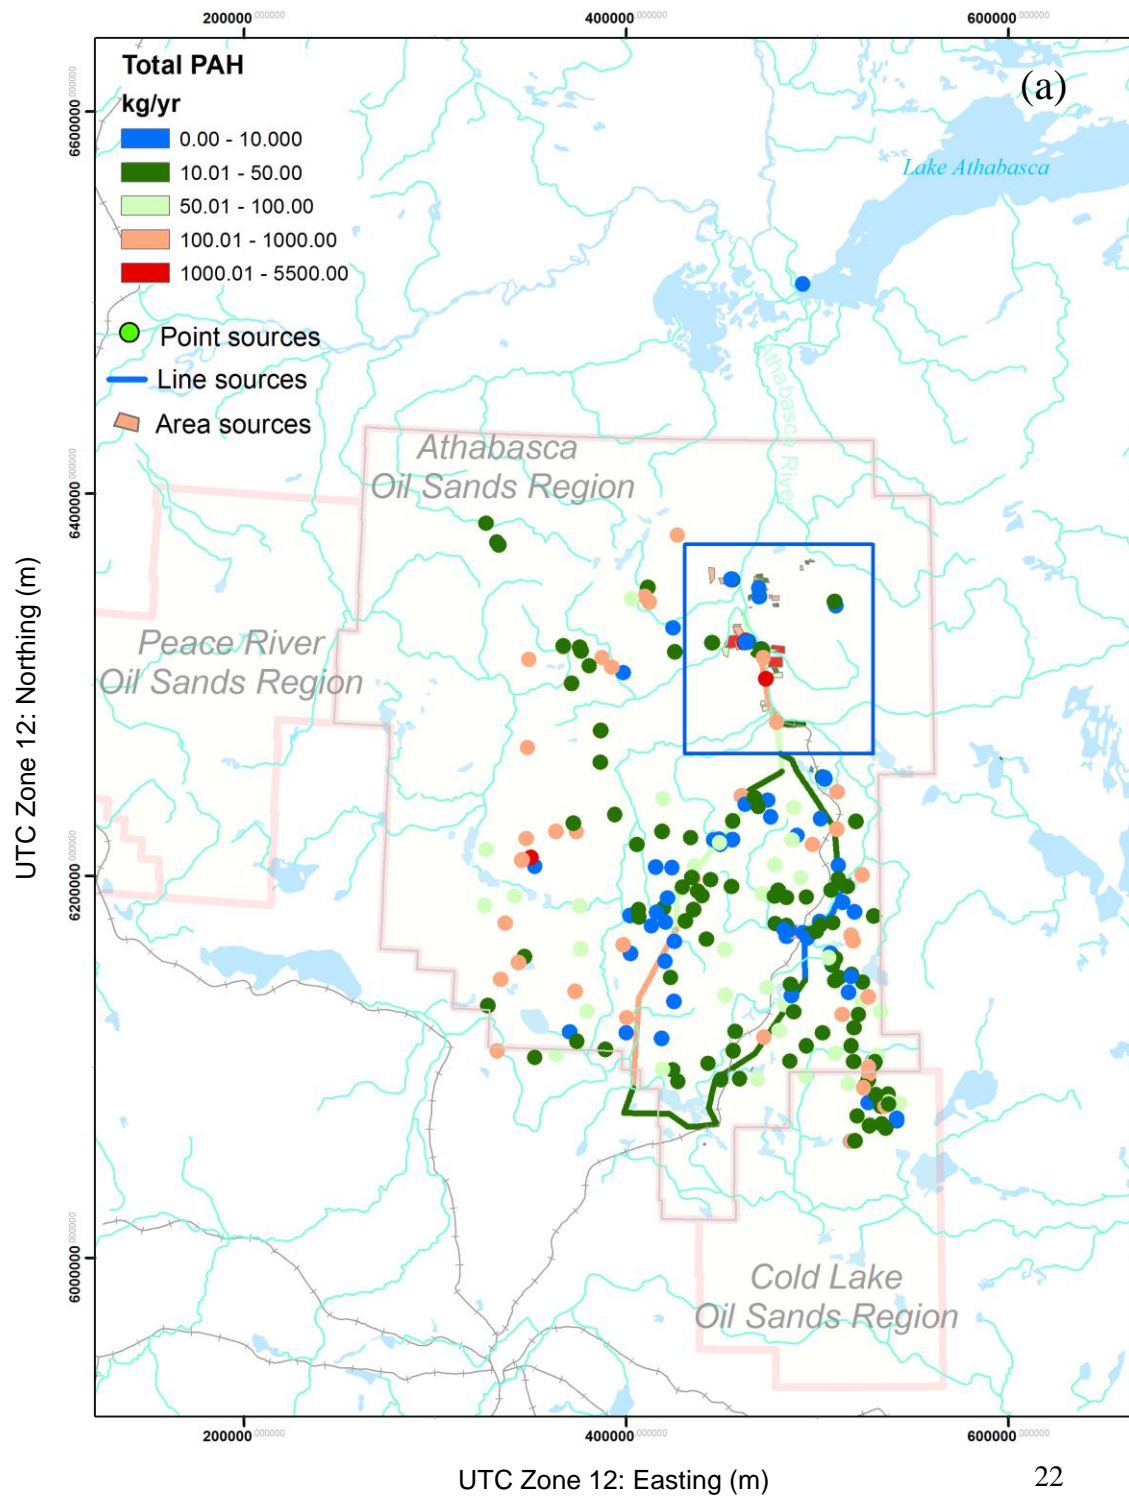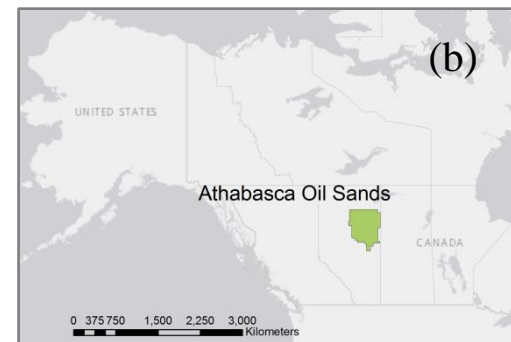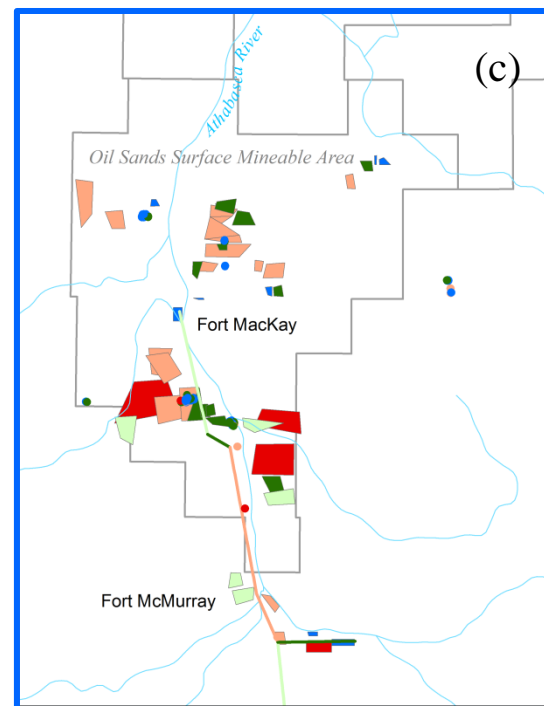

**Figure S3.** (a) Map of unsubstituted PAH emissions in the AOSR derived from the JOSM emissions database. (b) Inset map of western Canada showing the AOSR. (c) Zoomed-in map of emissions over the surface mineable area. Line sources include transportation emissions. Area sources include tailings pond, mine face, mine fleet, community heating, and airport and traffic emissions. Note: oil sands region boundaries are based on 2009 data.



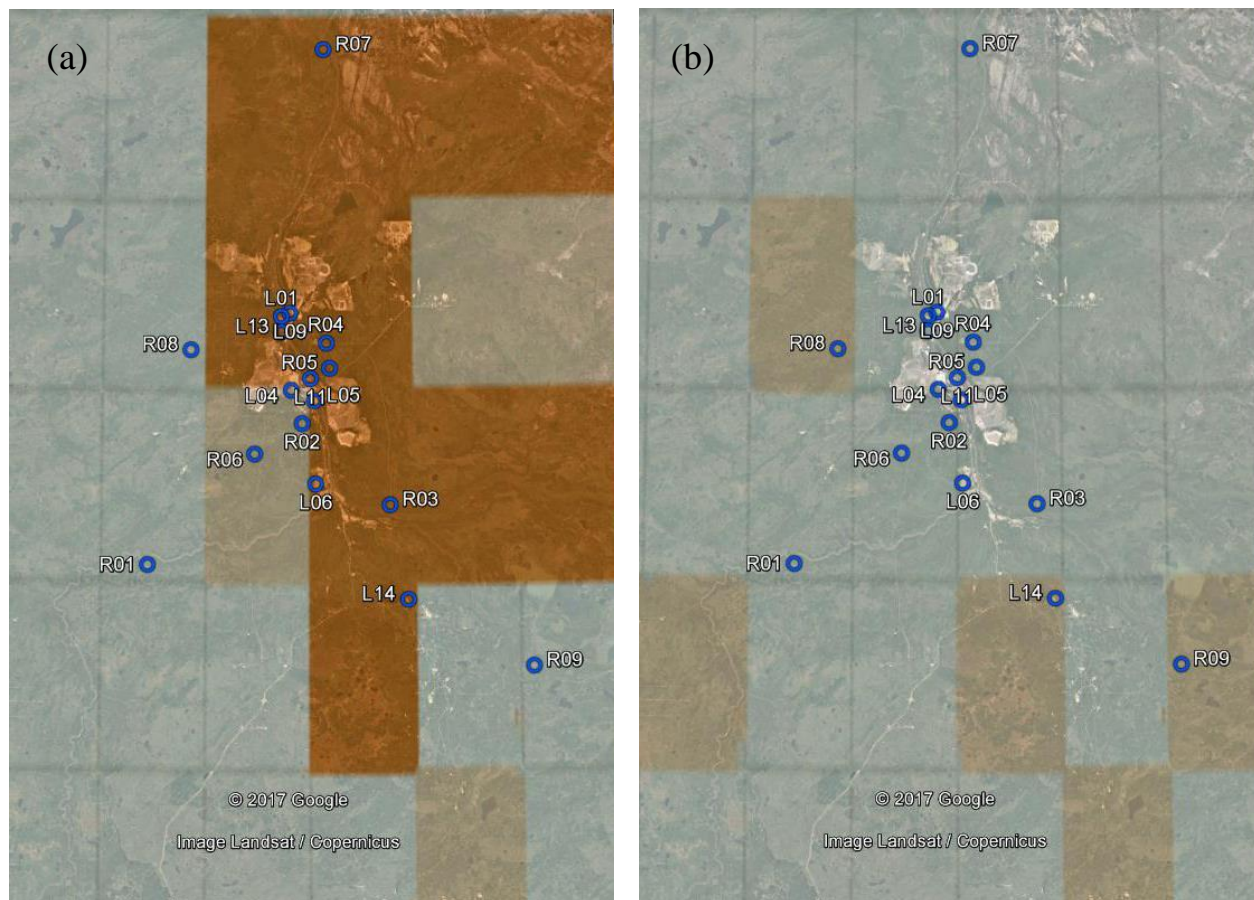

**Figure S4.** Mean fire radiative power (FRP in megawatts) during the active forest fire period from April 2011 to July 2011 (a) and excluding the April 2011 to July 2011 period in 2011 and 2012 (b). FRP is a measure of the intensity of biomass burning emissions; the data were obtained from MODIS (NASA, 2017). Dark orange: high intensity (80-220 MW); light orange: low intensity (10-39 MW); gray: zero intensity; blue circles: passive air monitoring sites.



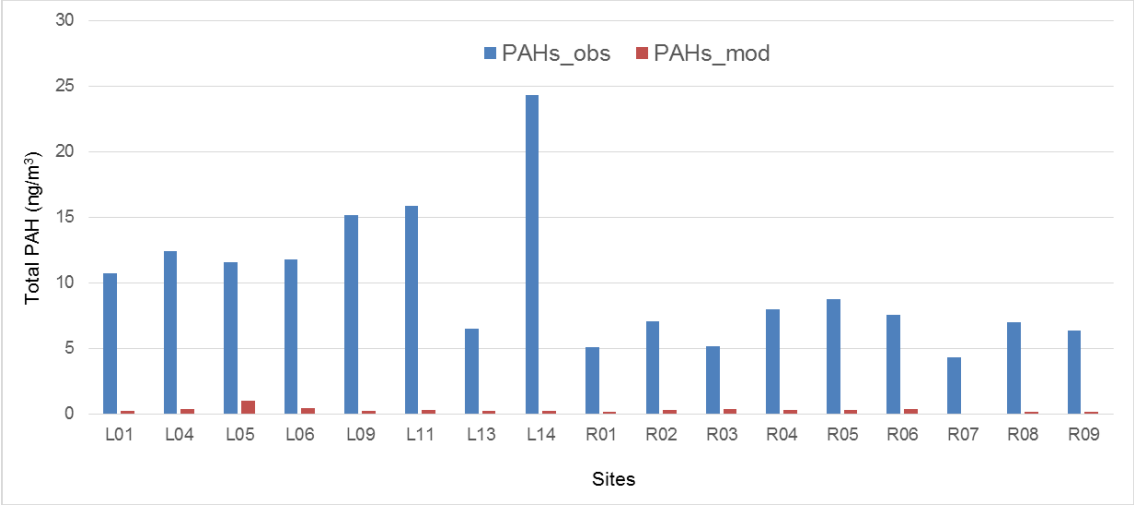

**Figure S5.** Model sensitivity analysis on the impact of point and line (transportation) source emissions (PAHs\_mod) on total PAH concentrations at 17 passive sampling sites (PAHs\_obs). PAHs\_mod refers to the simulation where only the point and line sources were included in the model.

## References in the Supplement

AESRD: Air Quality Model Guideline, 2013.

Alberta Environment (AENV): Air Quality Model Guideline, Pub. No. T/689, 2003.

CEMA: Development of a Modeling Emissions Inventory Database for the Implementation of Emissions Management Frameworks, available at: <http://library.cemaonline.ca/ckan/dataset/2011-0038>, 2011.

Environment and Climate Change Canada (ECCC) and Alberta Environment and Parks (AEP): Joint Oil Sands Monitoring Program Emissions Inventory Compilation Report, June 2016, available at: <http://aep.alberta.ca/air/reports-data/air-emissions-inventory.aspx>, 2016.

ECCC: Source Emissions, Oil Sands Region, Emissions-package, 2016. <http://donnees.ec.gc.ca/data/air/monitor/source-emissions-monitoring-oil-sands-region/source-emissions-oil-sands-region/emissions-package/?lang=en>, 2016.

Galarneau, E., Makar, P. A., Zheng, Q., Narayan, J., Zhang, J., Moran, M. D., Bari, M. A., Pathela, S., Chen, A., and Chlumsky, R.: PAH concentrations simulated with the AURAMS-PAH chemical transport model over Canada and the USA, *Atmos. Chem. Phys.*, 14, 4065-4077, 2014.

Lott, R. A.: Case Study of Plume Dispersion Over Elevated Terrain, *Atmos. Environ.*, 18, 125-134, 1984.

Malm, W. C.: Spatial and Seasonal Patterns and Temporal Variability of Haze and Its Constituents in the United States. Report III, Prepared by the Cooperative Institute for Research in the Atmosphere, Colorado State University, ISSN 0737 to 5352-47, 2000.

NASA: MODIS Collection 6 NRT Hotspot / Active Fire Detections [MCD14DL](https://doi.org/10.5067/FIRMS/MODIS/MCD14DL.NRT.006), DOI: [10.5067/FIRMS/MODIS/MCD14DL.NRT.006](https://doi.org/10.5067/FIRMS/MODIS/MCD14DL.NRT.006), 2017.

New Zealand Ministry for the Environment: Good Practice Guide for Atmospheric Dispersion Modelling, ISBN 0-478-18941-9, 2004.

Nopmongcol, U., Jung, J., Zagunis, J., Shah, T., Morris, R., Pollock, T., Allan, W., Qiu, X., Walters, N., and Yang, F.: Capital Region Particulate Matter Air Modelling Assessment Final Report, available at: <https://open.alberta.ca/dataset/capital-region-particulate-matter-air-modelling-assessment-final-report>, 2014.

Schuster, J. K., Harner, T., Su, K., Mihele, C., and Eng, A.: First Results from the Oil Sands Passive Air Monitoring Network for Polycyclic Aromatic Compounds, *Environ. Sci. Technol.*, 49, 2991–2998, 2015.

Scire, J. S., Robe, F. R., Ferneau, M. E., and Yamartino, R. J.: A User's Guide for the CALMET Meteorological Model, Earth Tech Inc., January 2000, p 332, 2000.

Simon, H., Beck, L., Bhave, P. V., Divita, F., Hsu, Y., Luecken, D., Mobley, J. D., Pouliot, G. A., Reff, A., Sarwar, G., and Strum, M.: The development and uses of EPA's SPECIATE database, *Atmos. Pollut. Res.*, 1(4), 196-206, 2010.

US EPA: User's Guide to the Building Profile Input Program, EPA-454/R-93-038, 1995.

US EPA: Revision to the Guideline on Air Quality Models: Adoption of a Preferred General Purpose (Flat and Complex Terrain) Dispersion Model and Other Revisions, Final Rule (40 CFR Part 51), 2005.

US EPA: Speciate 4.5, available at: <https://cfpub.epa.gov/speciate/>, 2017.

Vijayaraghavan, K., Nopmongcol, U., Grant, J., Morris, R., Pollock, T., Davies, M., and Person, R.: Protocol for updating and preparing a modelling emission inventory, Cumulative Environmental Management Association, Fort McMurray, Alberta, Canada, available at: <http://library.cemaonline.ca/ckan/dataset/2010-0031/resource/8f449c5d-3129-4d6f-a530-46ec33a46208>, 2010.
